# Supplementary material for: Novel solid-contact ion-selective electrode based on a polyaniline transducer layer for determination of alcaftadine in biological fluid
Source: Royal Society of Chemistry journal article supplement (doi:10.1039/d3ra00597f), 2023-01-01
Supplement: d3ra00597f1.pdf [file d3ra00597f1.pdf]

**Supporting Information**  
**for**  
**“Novel Solid-contact Ion-selective Electrode Based on**  
**Polyaniline Transducer Layer for Determination of**  
**Alcaftadine in Biological Fluid”**

Ola G. Hussein<sup>1</sup>, Dina A. Ahmed<sup>1</sup>, Mohamed Abdelkawy<sup>2</sup>, Mamdouh R. Rezk<sup>2</sup>, Amr M. Mahmoud<sup>2\*</sup>, Yasmin Rostom<sup>2</sup>

<sup>1</sup>Pharmaceutical Chemistry Department, Faculty of Pharmacy, Future University in Egypt, Cairo, Egypt.

<sup>2</sup>Analytical Chemistry Department, Faculty of Pharmacy, Cairo University, Kasr El-Aini Street, Cairo 11562, Egypt.

\*Corresponding author email: [amr.bekhet@pharma.cu.edu.eg](mailto:amr.bekhet@pharma.cu.edu.eg)

# Figures

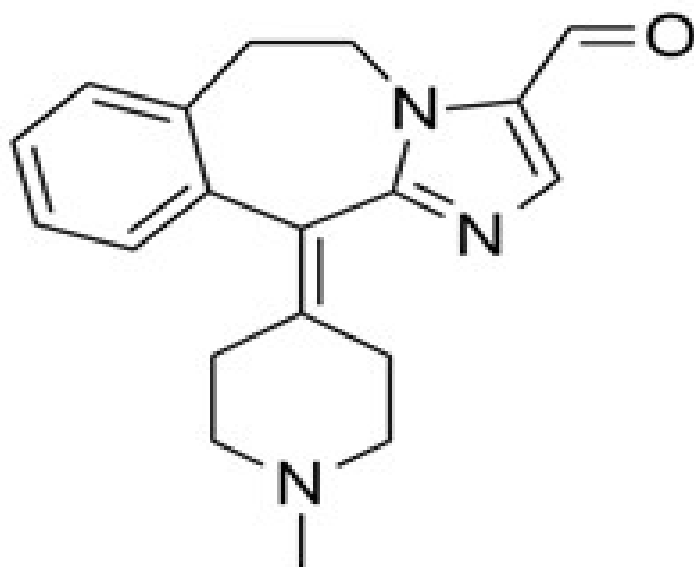

**Fig. S1.** Chemical structure of ALF.

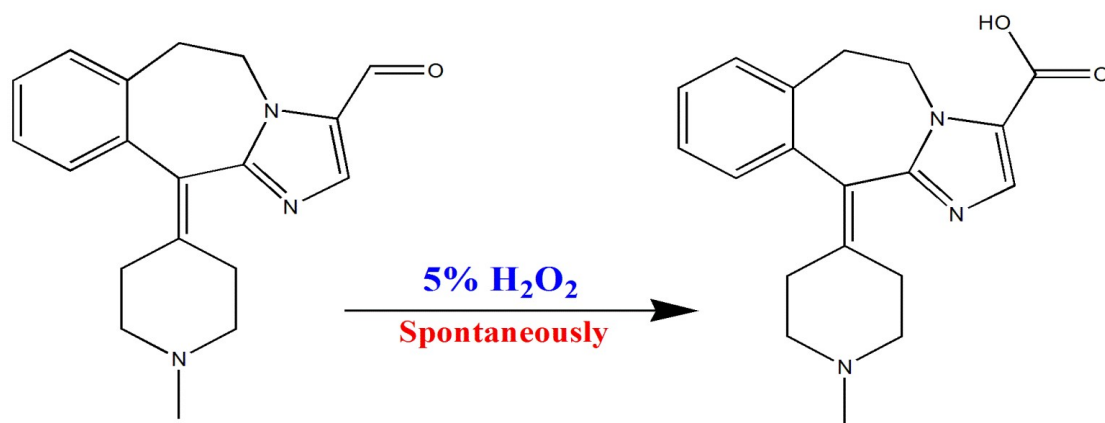

**Fig. S2:** Proposed degradation pathway of ALF.

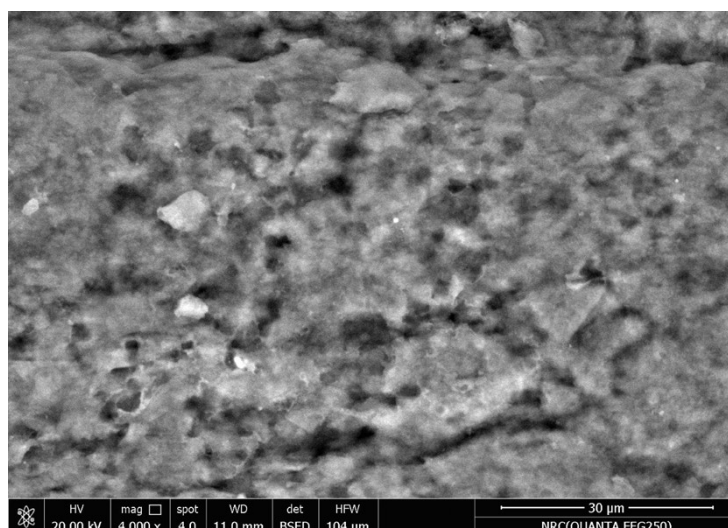

**Figure S3.** Scanning electron microscope image of modified electrode GCE/PANI.

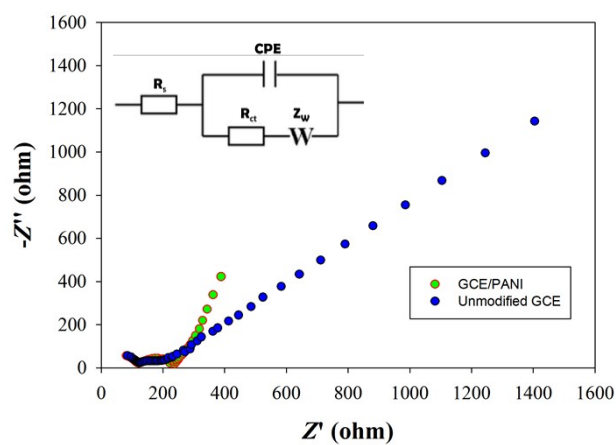

**Figure S4.** Nyquist plot based on electrochemical impedance spectroscopy (EIS) measurements of unmodified GCE and GCE/PANI surfaces. Measurements were performed in 0.1 M KCl at 25 °C. Frequency range 0.1 Hz - 100 kHz, ac voltage amplitude 5 mV. Inset: the Randles' circuit proposed to fit the EIS experimental result.
